# Supplementary material
Source: publisher site journal article supplement (https://www.dovepress.com/article/228249)
Supplement: Supplementary file 1 [file get_supplementary_file.php]

|  | **Please read the statement and tick the box that relates best to your personal opinion** | **Strongly disagree** | **Disagree** | **Neither disagree nor agree** | **Agree** | **Strongly agree** |
| --- | --- | --- | --- | --- | --- | --- |
| 1 | I feel comfortable in dealing with depressed patients’ needs. |  |  |  |  |  |
| 2 | Depression is a disease like any other (e.g. asthma, diabetes). |  |  |  |  |  |
| 3 | Psychological therapy tends to be unsuccessful with people who are depressed. |  |  |  |  |  |
| 4 | Antidepressant therapy tends to be unsuccessful with people who are depressed. |  |  |  |  |  |
| 5 | One of the main causes of depression is a lack of self-discipline and will-power. |  |  |  |  |  |
| 6 | Depression treatments medicalise unhappiness |  |  |  |  |  |
| 7 | I feel confident in assessing depression in patients. |  |  |  |  |  |
| 8 | I am more comfortable working with physical illness than with mental illnesses like depression. |  |  |  |  |  |
| 9 | Becoming depressed is a natural part of being old. |  |  |  |  |  |
| 10 | All health professionals should have skills in recognising and managing depression. |  |  |  |  |  |
| 11 | My profession is well placed to assist patients with depression. |  |  |  |  |  |
| 12 | Becoming depressed is a way that people with poor stamina deal with life difficulties. |  |  |  |  |  |
| 13 | Once a person has made up their mind about taking their own life no one can stop them. |  |  |  |  |  |
| 14 | People with depression have care needs similar to other medical conditions like diabetes, COPD or arthritis. |  |  |  |  |  |
| 15 | My profession is well trained to assist patients with depression. |  |  |  |  |  |
| 16 | Reconocer y manejar la depresión es usualmente una parte importante en el manejo de otros problemas de salud. |  |  |  |  |  |
| 17 | I feel confident in assessing suicide risk in patients presenting with depression. |  |  |  |  |  |
| 18 | It is rewarding to spend time looking after depressed patients |  |  |  |  |  |
| 19 | Becoming depressed is a natural part of adolescence |  |  |  |  |  |
| 20 | There is little to be offered to depressed patients who do not respond to initial treatments. |  |  |  |  |  |
| 21 | Anyone can suffer from depression. |  |  |  |  |  |
